# Supplementary material for: Anti-thermal-quenching red-emitting GdNbO4:Pr3+ phosphor based on metal-to-metal charge transfer for optical thermometry application
Source: Royal Society of Chemistry journal article supplement (doi:10.1039/d1tc03978d), 2021-01-01
Supplement: d1tc03978d1.pdf [file d1tc03978d1.pdf]

## Supporting Information

### **Anti-Thermal-Quenching Red-Emitting GdNbO<sub>4</sub>: Pr<sup>3+</sup> Phosphors Based on Metal-to-Metal Charge Transfer for Optical Thermometry Application**

*Wanggui Ye,<sup>a,b</sup> Chaoyang Ma,<sup>a,d,\*</sup> Yanbin Li,<sup>a,b</sup> Chong Zhao,<sup>a,b</sup> Yuzhen Wang,<sup>a,b</sup> Chuandong Zuo,<sup>a,b</sup> Zicheng Wen,<sup>a, d</sup> Yingkui Li,<sup>a,d</sup> Xuanyi Yuan,<sup>b</sup> and Yongge Cao<sup>a,c,d,\*</sup>*

<sup>a</sup> Songshan Lake Materials Laboratory, Dongguan 523808, Guangdong, China

<sup>b</sup> Department of Physics, Renmin University of China, Beijing 100872, China

<sup>c</sup> Institute of Physics, Chinese Academy of Sciences, Beijing 100190, China

<sup>d</sup> Dongguan Academy of Advanced Ceramics and Composite Materials, Dongguan 523722, Guangdong, China

\*Corresponding authors: C.Y. Ma [machaoyang@sslslab.org.cn](mailto:machaoyang@sslslab.org.cn)

Y.G. Cao [caoyongge@sslslab.org.cn](mailto:caoyongge@sslslab.org.cn)

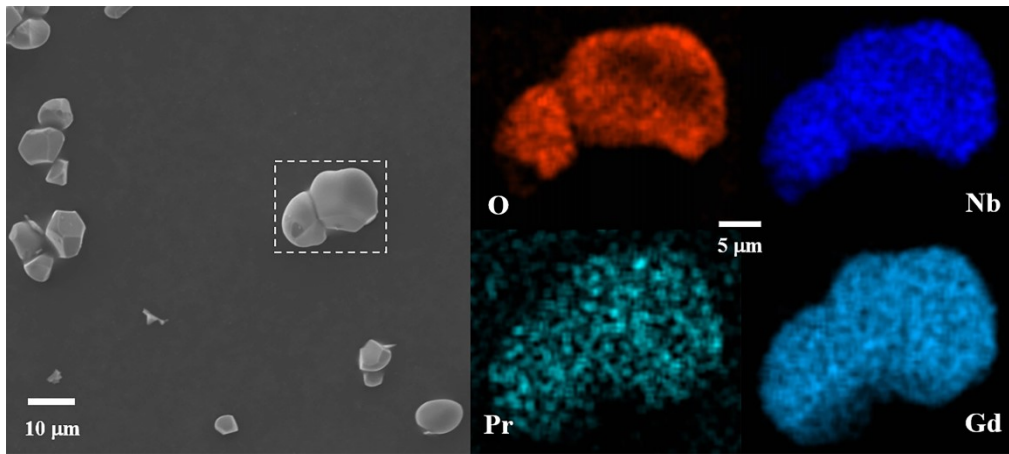

**Figure S1** SEM and corresponding mapping images of  $\text{GdNbO}_4: 0.1\% \text{Pr}^{3+}$ .

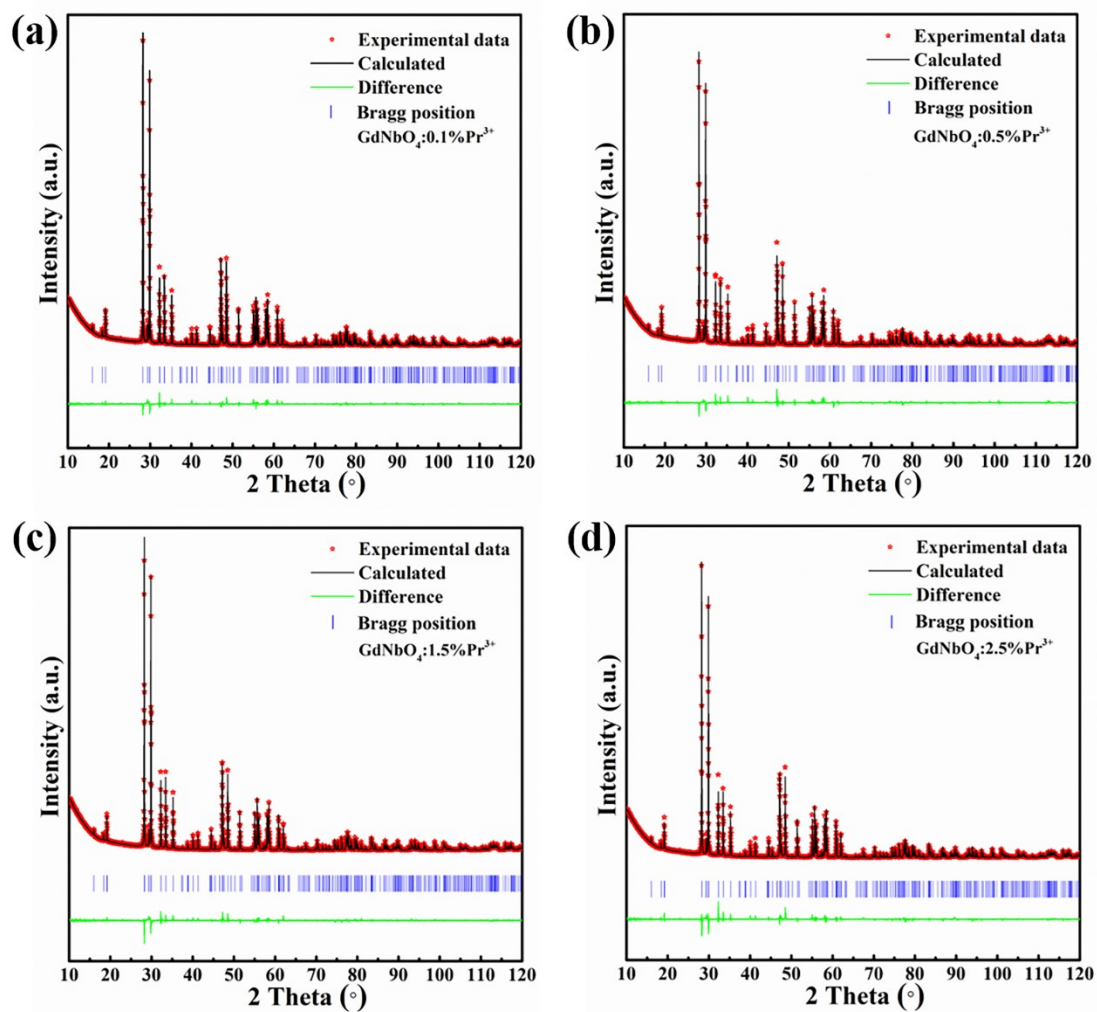

**Figure S2.** Experimental (points), calculated (solid line) and difference (bottom) X-ray diffraction patterns for  $\text{GdNbO}_4: x\%\text{Pr}^{3+}$  ( $x= 0.1, 0.5, 1.5, 2.5$ ) samples.

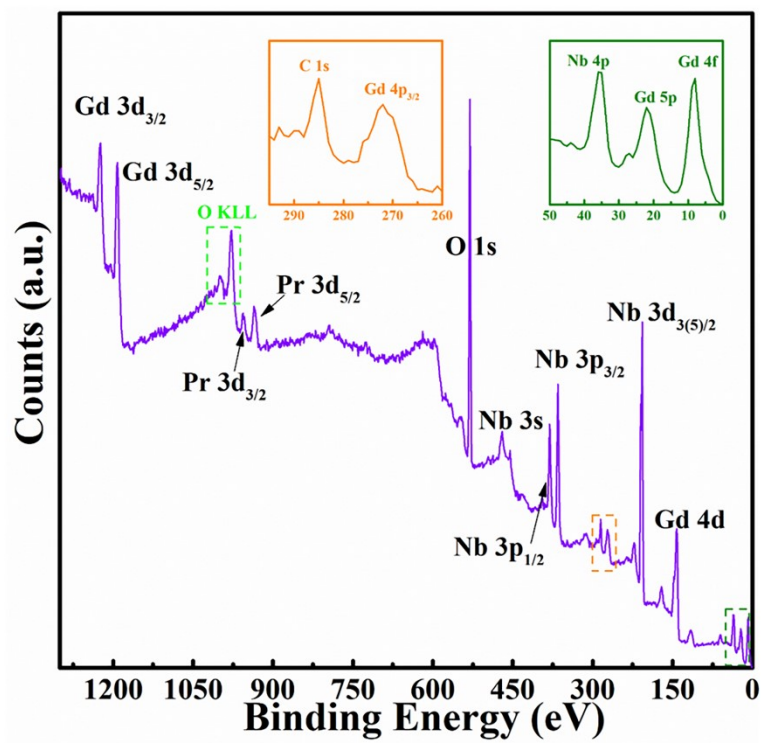

Figure S3. The XPS spectra of GdNbO<sub>4</sub>: 30%Pr<sup>3+</sup> phosphor.

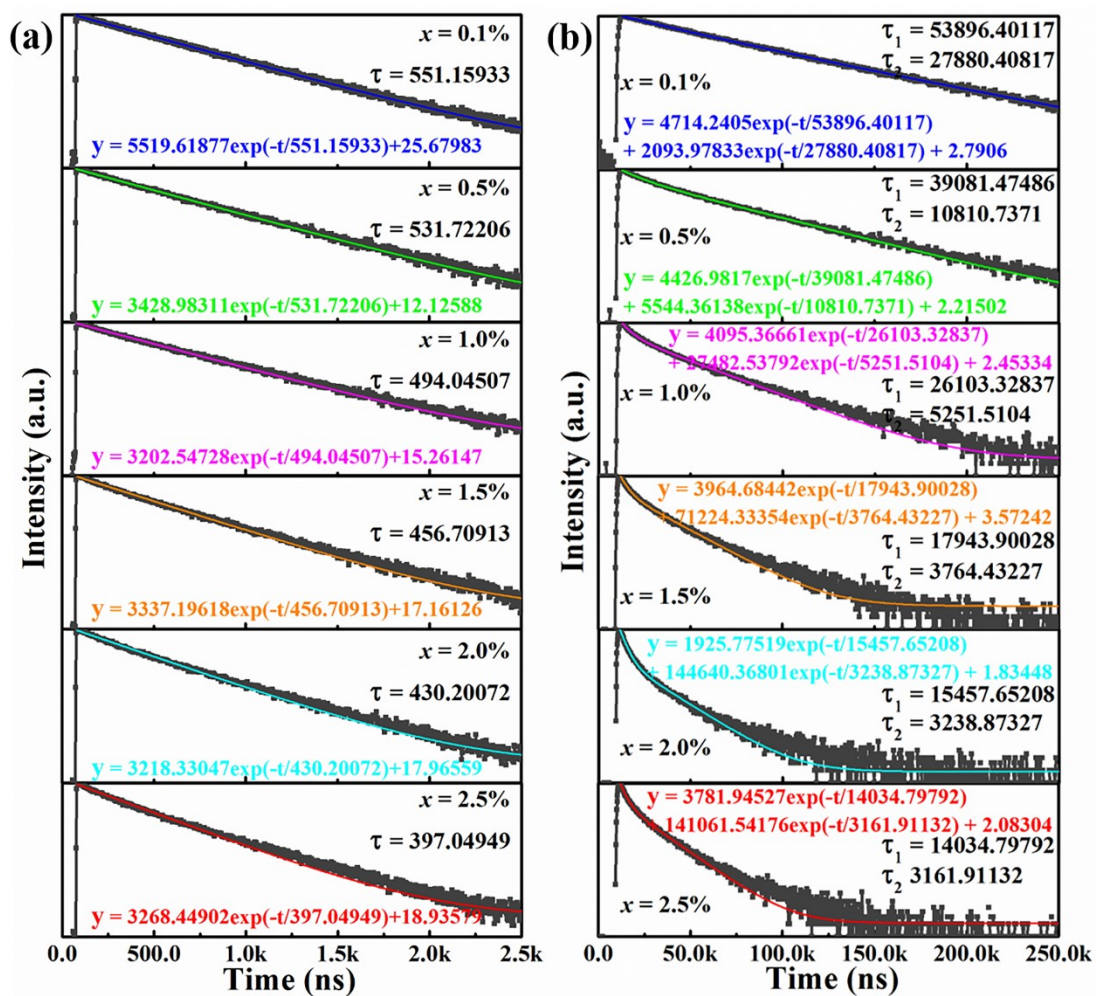

**Figure S4.** Experiment measured (at room temperature) and fitted PL decay curves of GNO:  $x\%Pr^{3+}$  ( $x = 0.1-2.5$ ) monitored at (a) 490 nm and (b) 605 nm.

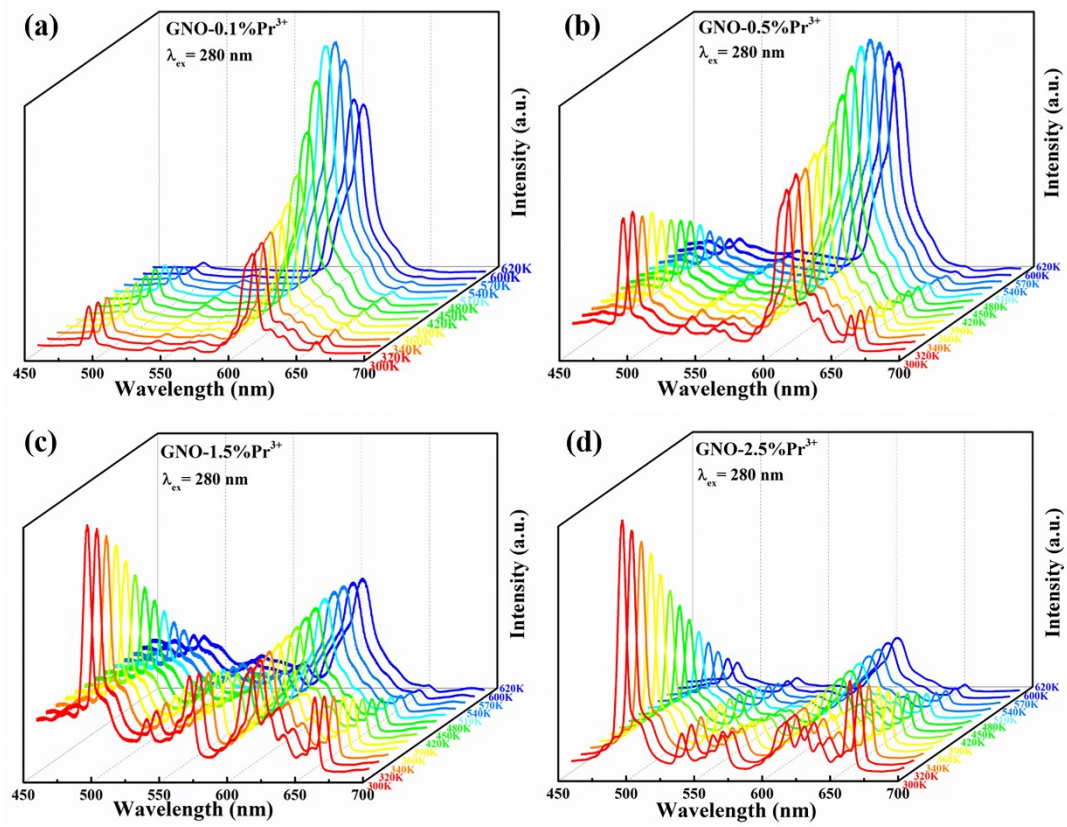

**Figure S5.** Temperature-dependent PL spectra of GNO:  $x\% \text{Pr}^{3+}$  (a)  $x= 0.1$ , (b)  $x= 0.5$ , (c)  $x= 1.5$  and (d)  $x= 2.5$  under 280 nm excitation in the range of 300- 620 K.

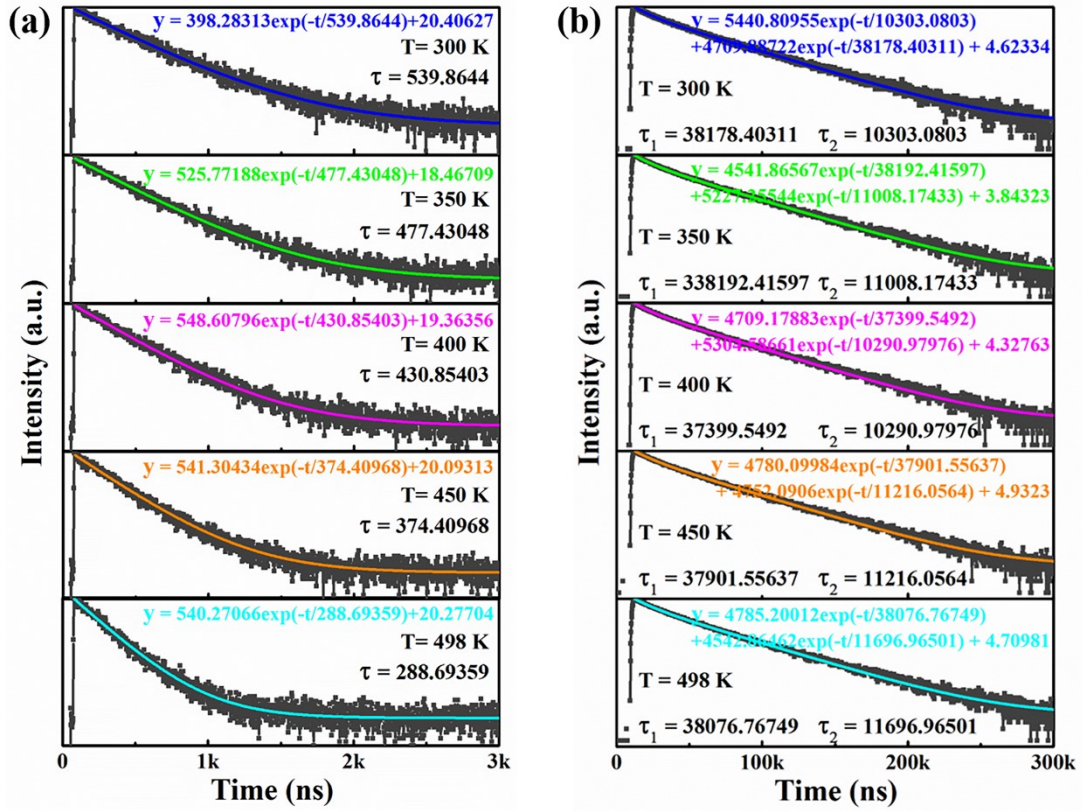

**Figure S6.** The temperature-dependent lifetimes of  $\text{Pr}^{3+}$  monitored at (a)  $\lambda_{\text{em}} = 490$  and (b)  $605$  nm for  $\text{GNO}: x\%\text{Pr}^{3+}$  ( $x = 0.5$ ) with  $\lambda_{\text{ex}} = 280$  nm.

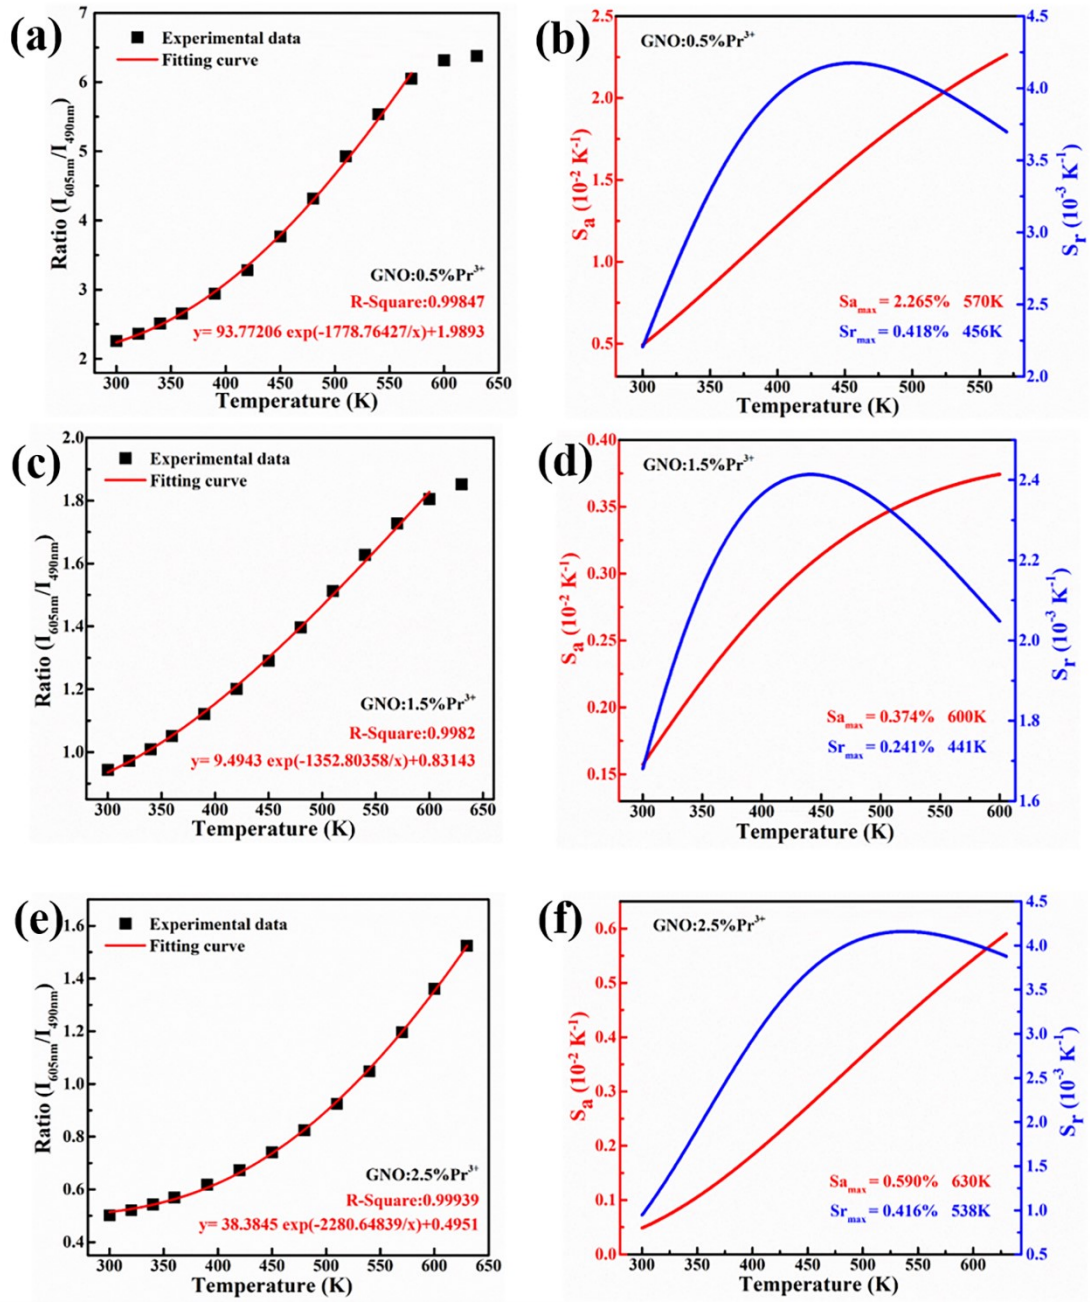

**Figure S7.** Experimental data and fitted plots of FIR ( $I_{605nm}/I_{490nm}$ ) versus temperature for GNO:  $x\%Pr^{3+}$  with (a)  $x=0.5$ , (c)  $x=1.5$ , (e)  $x=2.5$ . Plot of absolute sensitivity  $S_a$  and relative sensitivity  $S_r$  vs temperature for GNO: $x\%Pr^{3+}$  with (b)  $x=0.5$ , (d)  $x=1.5$ , (f)  $x=2.5$ .



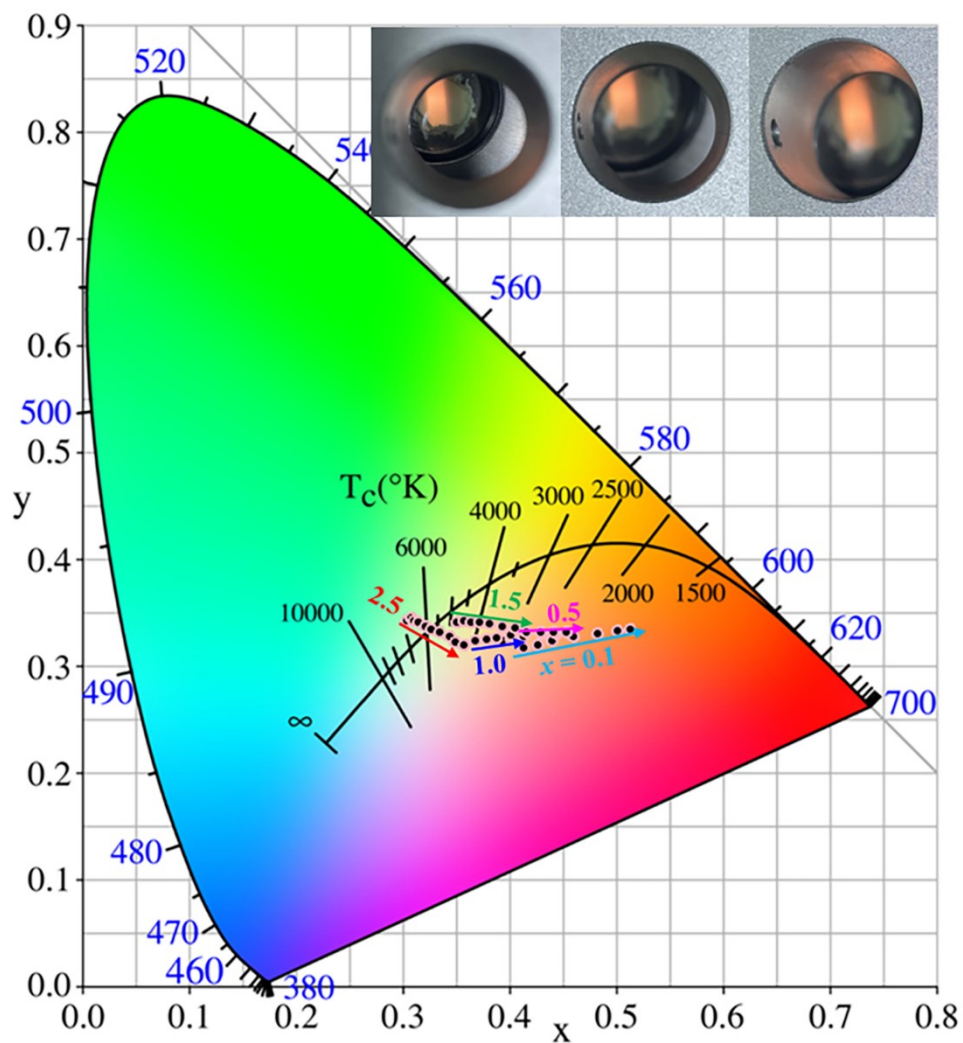

**Figure S8.** CIE coordinate diagram of the emission color (for GNO:  $x\%$  ( $x=0.1, 0.5, 1.0, 1.5, 2.5$ )) at various temperatures, insets show photos of the temperature-controlled heating device with a reflector.

**Table S1.** Refinement results of the atomic coordinates of GdNbO<sub>4</sub>: x%Pr<sup>3+</sup> (x= 0.1, 0.5, 1.5, 2.5)

| <b>Formula</b>                      | <b>Atom</b> | <b>x</b> | <b>y</b> | <b>z</b> | <b>Occupancy</b> | <b>Mult</b> | <b>B</b> |
|-------------------------------------|-------------|----------|----------|----------|------------------|-------------|----------|
| <b>GNO:<br/>0.1%Pr<sup>3+</sup></b> | Gd1         | 0.25000  | 0.62159  | 0.00000  | 0.49959          | 4           | 0.10428  |
|                                     | Pr1         | 0.25000  | 0.62159  | 0.00000  | 0.00041          | 4           | 0.10428  |
|                                     | Nb1         | 0.25000  | 0.14619  | 0.00000  | 0.50000          | 4           | 0.33063  |
|                                     | O1          | 0.09884  | 0.46374  | 0.23747  | 1.00000          | 8           | 0.31660  |
|                                     | O2          | -0.00768 | 0.71687  | 0.29666  | 1.00000          | 8           | 0.34669  |
| <b>GNO:<br/>0.5%Pr<sup>3+</sup></b> | Gd1         | 0.25000  | 0.62199  | 0.00000  | 0.49807          | 4           | 0.16285  |
|                                     | Pr1         | 0.25000  | 0.62199  | 0.00000  | 0.00193          | 4           | 0.16285  |
|                                     | Nb1         | 0.25000  | 0.14618  | 0.00000  | 0.50000          | 4           | 0.65979  |
|                                     | O1          | 0.08825  | 0.46202  | 0.23492  | 1.00000          | 8           | 0.57812  |
|                                     | O2          | -0.00301 | 0.71490  | 0.30074  | 1.00000          | 8           | 0.72014  |
| <b>GNO:<br/>1.5%Pr<sup>3+</sup></b> | Gd1         | 0.25000  | 0.62125  | 0.00000  | 0.49312          | 4           | 0.48339  |
|                                     | Pr1         | 0.25000  | 0.62125  | 0.00000  | 0.00688          | 4           | 0.48339  |
|                                     | Nb1         | 0.25000  | 0.14598  | 0.00000  | 0.50000          | 4           | 0.70733  |
|                                     | O1          | 0.10429  | 0.46255  | 0.24784  | 1.00000          | 8           | 1.32119  |
|                                     | O2          | -0.00296 | 0.71348  | 0.30186  | 1.00000          | 8           | 0.83305  |
| <b>GNO:<br/>2.5%Pr<sup>3+</sup></b> | Gd1         | 0.25000  | 0.62175  | 0.00000  | 0.48891          | 4           | 0.45088  |
|                                     | Pr1         | 0.25000  | 0.62175  | 0.00000  | 0.01109          | 4           | 0.45088  |
|                                     | Nb1         | 0.25000  | 0.14592  | 0.00000  | 0.50000          | 4           | 0.63408  |
|                                     | O1          | 0.09536  | 0.46133  | 0.23208  | 1.00000          | 8           | 1.43814  |
|                                     | O2          | -0.00402 | 0.71637  | 0.29757  | 1.00000          | 8           | 0.85473  |
